# Supplementary material for: Antioxidant and Cytoprotective Effects of Kukoamines A and B: Comparison and Positional Isomeric Effect
Source: MDPI journal article supplement (doi:10.3390/molecules23040973), 2018-04-21
Supplement: s1 [file s1]

# Antioxidant and Cytoprotective Effects of Kukoamine A & B: Comparison and Positional Isomeric Effects

Xican Li<sup>1,2,\*†</sup>, Jian Lin<sup>3,4,†</sup>, Ban Chen<sup>1,2</sup>, Fei Li<sup>5</sup>, Hong Xie<sup>1,2</sup>, Dongfeng Chen<sup>3,4,\*</sup>

<sup>1</sup> School of Chinese Herbal Medicine, <sup>2</sup> Innovative Research & Development Laboratory of TCM, <sup>3</sup> School of Basic Medical Science, <sup>4</sup> The Research Center of Basic Integrative Medicine, Guangzhou University of Chinese Medicine, <sup>5</sup> Jinan Municipal Hospital of Traditional Chinese Medicine, Jinan 250012, China.

\* Corresponding author. E-mail: [lixican@126.com](mailto:lixican@126.com) (X.L.); [chen888@gzucm.edu.cn](mailto:chen888@gzucm.edu.cn) (D.C.)

† Equal contributors

**Postal addresses:** Guangzhou University of Chinese Medicine, No.232, Waihuan East Road, Guangzhou Higher Education Mega Center, Panyu District, Guangzhou, 510006, China

**Homepage:** [http://www.researchgate.net/profile/Xican\\_Li](http://www.researchgate.net/profile/Xican_Li)

**Tel:** +86 20 39358076

**Fax:** +86 20 38892697

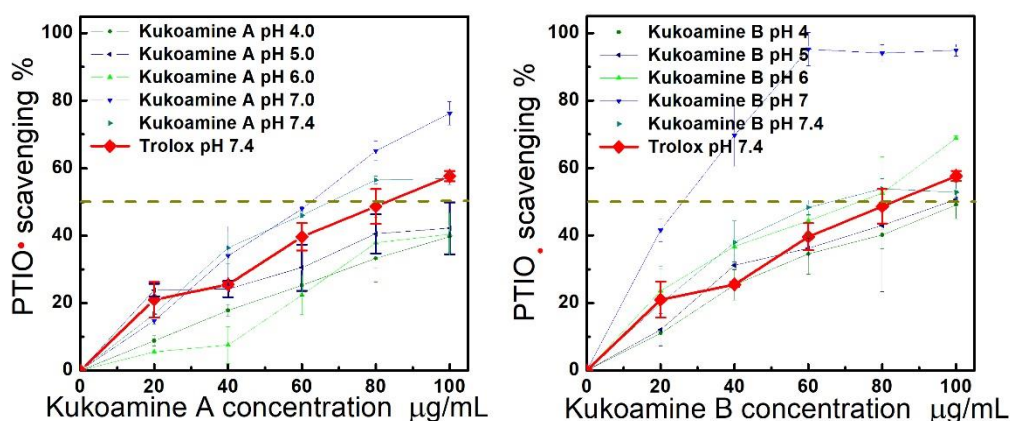

**Suppl. 2** The dose-response curves of Trolox in PTIO• scavenging assay: (A) comparison with kukoamine A; (B) comparison with kukoamine B.
