# Supplementary material for: Antioxidant and Cytoprotective Effects of Kukoamines A and B: Comparison and Positional Isomeric Effect
Source: MDPI journal article supplement (doi:10.3390/molecules23040973), 2018-04-21
Supplement: s1 [file s1]

# Antioxidant and Cytoprotective Effects of Kukoamines A and B: Comparison and Positional Isomeric Effect

Xican Li <sup>1, 2, \*, †</sup>, Jian Lin <sup>3, 4, †</sup>, Ban Chen <sup>1, 2</sup>, Fei Li <sup>5</sup>, Hong Xie <sup>1, 2</sup>, Dongfeng Chen <sup>3, 4, \*</sup>

<sup>1</sup> School of Chinese Herbal Medicine, <sup>2</sup> Innovative Research & Development Laboratory of TCM, <sup>3</sup> School of Basic Medical Science, <sup>4</sup> The Research Center of Basic Integrative Medicine, Guangzhou University of Chinese Medicine, <sup>5</sup> Jinan Municipal Hospital of Traditional Chinese Medicine, Jinan 250012, China.

\* Corresponding author. E-mail: [lixican@126.com](mailto:lixican@126.com) (X.L.); [chen888@gzucm.edu.cn](mailto:chen888@gzucm.edu.cn) (D.C.)

† Equal contributors

**Postal addresses:** Guangzhou University of Chinese Medicine, No.232, Waihuan East Road, Guangzhou Higher Education Mega Center, Panyu District, Guangzhou, 510006, China

**Homepage:** [http://www.researchgate.net/profile/Xican\\_Li](http://www.researchgate.net/profile/Xican_Li)

**Tel:** +86 20 39358076

**Fax:** +86 20 38892697

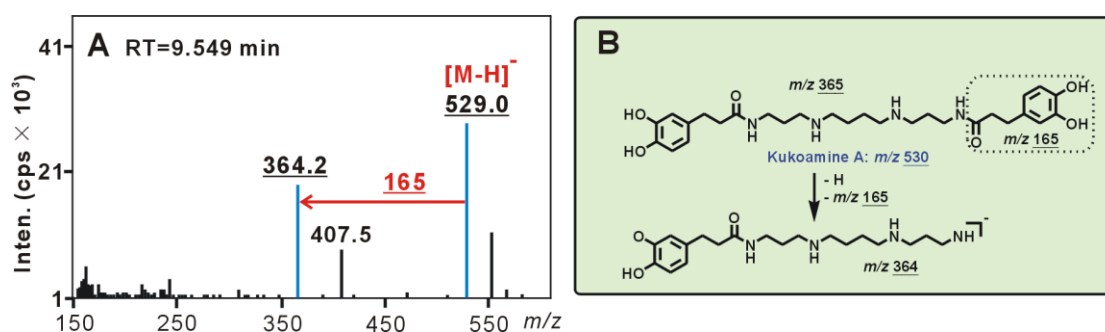

Suppl. 3 The MS spectra Kukoamine A determined by our instrument (HPLC-ESI-MS/MS system, TSQ Quantum Access MAX, Thermo Fisher Corp. USA) (A) and elucidation of Kukoamine A (B)
