# Supplementary material for: Antioxidant and Cytoprotective Effects of Kukoamines A and B: Comparison and Positional Isomeric Effect
Source: MDPI journal article supplement (doi:10.3390/molecules23040973), 2018-04-21
Supplement: s1 [file s1]

# Antioxidant and Cytoprotective Effects of Kukoamines A and B: Comparison and Positional Isomeric Effect

Xican Li <sup>1, 2, \*, †</sup>, Jian Lin <sup>3, 4, †</sup>, Ban Chen <sup>1, 2</sup>, Fei Li <sup>5</sup>, Hong Xie <sup>1, 2</sup>, Dongfeng Chen <sup>3, 4, \*</sup>

<sup>1</sup> School of Chinese Herbal Medicine, <sup>2</sup> Innovative Research & Development Laboratory of TCM, <sup>3</sup> School of Basic Medical Science, <sup>4</sup> The Research Center of Basic Integrative Medicine, Guangzhou University of Chinese Medicine, <sup>5</sup> Jinan Municipal Hospital of Traditional Chinese Medicine, Jinan 250012, China.

\* Corresponding author. E-mail: [lixican@126.com](mailto:lixican@126.com) (X.L.); [chen888@gzucm.edu.cn](mailto:chen888@gzucm.edu.cn) (D.C.)

† Equal contributors

**Postal addresses:** Guangzhou University of Chinese Medicine, No.232, Waihuan East Road, Guangzhou Higher Education Mega Center, Panyu District, Guangzhou, 510006, China

**Homepage:** [http://www.researchgate.net/profile/Xican\\_Li](http://www.researchgate.net/profile/Xican_Li)

**Tel:** +86 20 39358076

**Fax:** +86 20 38892697

---

## Kukoamine A 0.1mg/mL

实验时间: 2017-12-27, 19:28:10  
谱图文件: C:\浙大智达\N2000\样品\Kukoamine A.mdy

实验者:  
报告时间: 2017-12-27, 19:28:23  
积分方法: 面积归一法

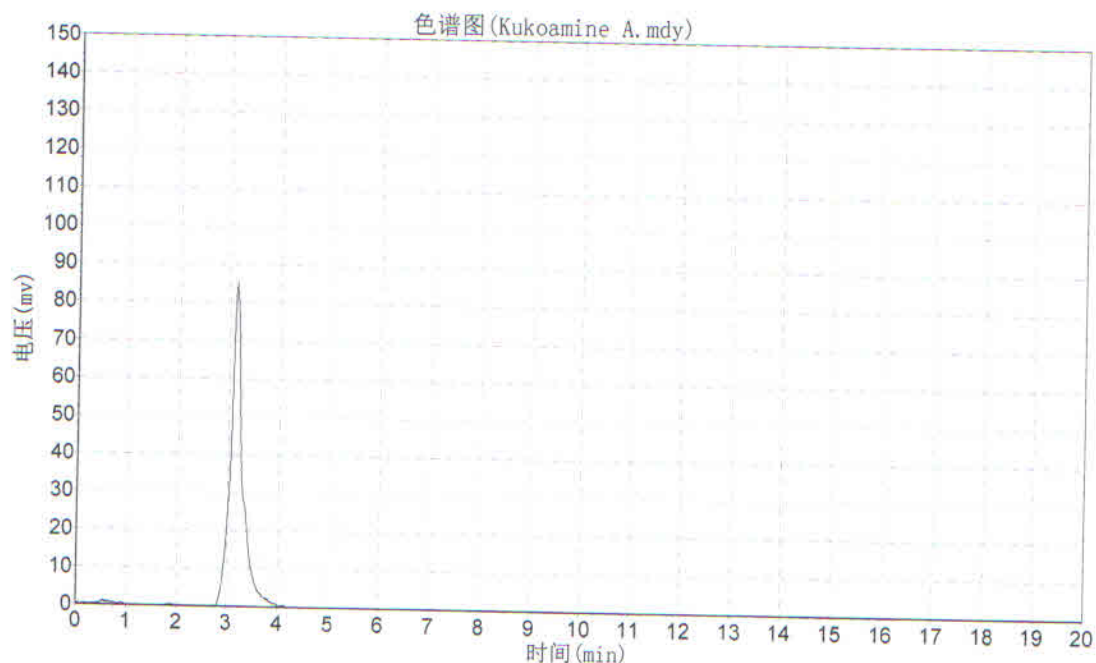

分析结果表

| 峰号 | 峰名 | 保留时间  | 峰高        | 峰面积         | 含量       |
|----|----|-------|-----------|-------------|----------|
| 1  |    | 3.140 | 84752.164 | 1447065.125 | 97.7033  |
| 2  |    | 7.207 | 2707.512  | 34015.887   | 2.2967   |
| 总计 |    |       | 87459.677 | 1481081.012 | 100.0000 |

Column Type: Agilent 5 TC-C18 250\*4.6 mm column

Mobile Phases: Acetonitrile 10 %, 0.1% phosphoric acid in water 90%

Flow Rate: 1 mL/min

Detection Mode and Setting: UV280nm

Sample Diluent(s): Water

Sample Concentration: Approx 100µg/ml

Injection Volume: 10µl

Calculation: Area percent normalization

产品分析证书  
Certificate of Analysis

中文名称: 地骨皮乙素

English Name: Kukoamine B

别名 (Alias):

产品编码 (Cat. No.): BP0834

CAS Number: 164991-67-7

分子式 (M. F.): C<sub>28</sub>H<sub>42</sub>N<sub>4</sub>O<sub>6</sub>

分子量 (M. W.): 530.666

批号 (Batch No.): PRF7090543

报告日期 (Report date): 2016/9/5

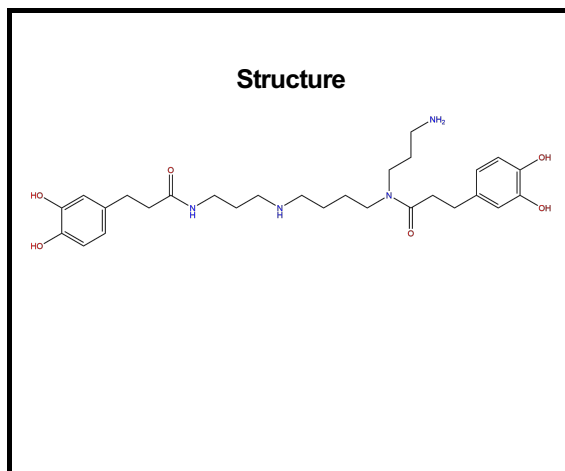

检验结果 (Analytical result):

| 检验项目 (Test Item)             | 检验指标 (Specifications)     | 检验结果 (Results) |
|------------------------------|---------------------------|----------------|
| 外观 Appearance                | Brown powder              | Brown powder   |
| 干燥失重 Loss on drying          | <3.0%                     | 1.6%           |
| 纯度 Purity (HPLC-DAD, 280nm)* | ≥98.0%                    | 98.37%         |
| 质谱 Mass                      | 530.666±1                 | Conforms       |
| 核磁 NMR                       | Comply with the structure | Conforms       |

\* 色谱图见附件 (Please find HPLC chromatography attached.)

贮存条件 (Storage): 2~8℃

复测期 (Retest date): two years (2018-09-04) under conditions list above.

备注 (Remarks): 如遇质量问题, 请于收到产品之日起 15 日内与我们联系。

In case of quality issue, please contact us within 15 days after receipt of the product.

QC:

Zhang Ling

Date: 2016年9月5日

QA:

Wu Qi

Date: 2016年9月5日

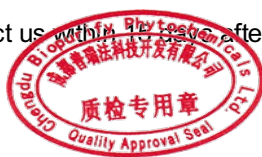

## SAMPLE INFORMATION

|                                       |                                  |
|---------------------------------------|----------------------------------|
| Sample Name: Kukoamine B              | Acquired By: System              |
| Sample Type: Unknown                  | Sample Set Name:                 |
| Vial: 80                              | Acq. Method Set: Kukoamine B     |
| Injection #: 1                        | Processing Method: sample        |
| Injection Volume: 25.00 ul            | Channel Name: 280.0nm            |
| Run Time: 25.0 Minutes                | Proc. Chnl. Descr.: PDA 280.0 nm |
| Date Acquired: 2016-9-5 15:30:07 CST  |                                  |
| Date Processed: 2016-9-5 16:00:00 CST |                                  |

### Auto-Scaled Chromatogram

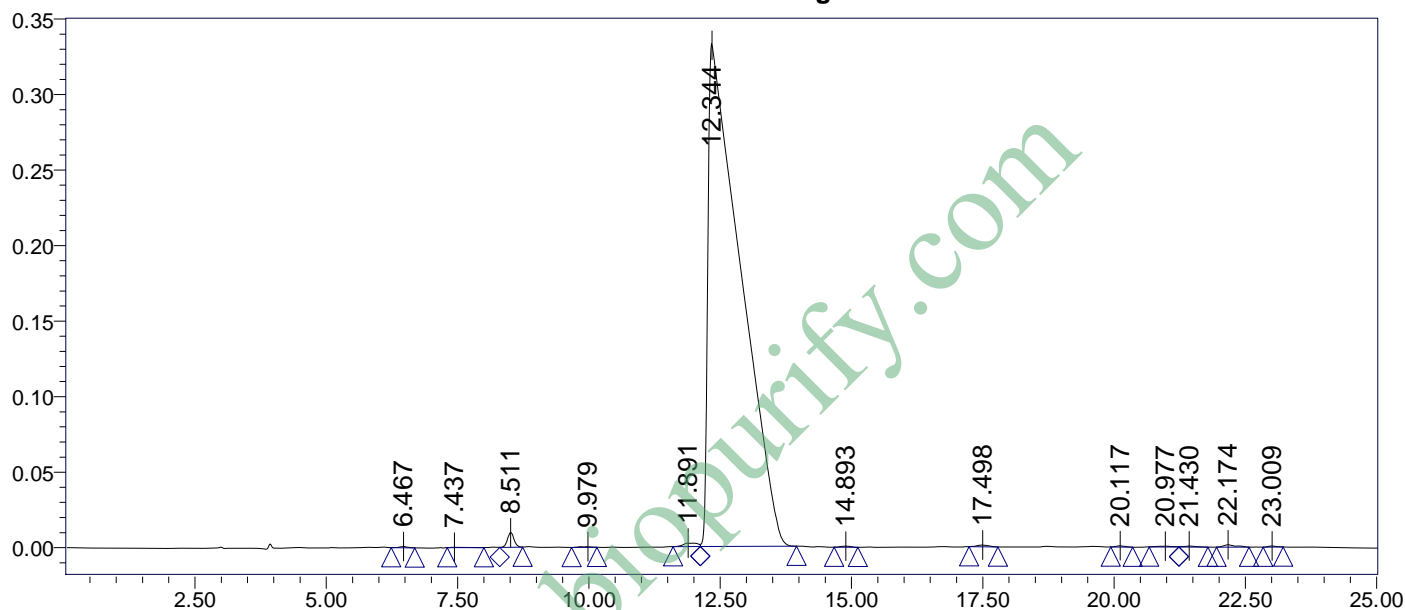

### Peak Results

|    | RT     | Area     | % Area | USP Plate Count | USP Resolution |
|----|--------|----------|--------|-----------------|----------------|
| 1  | 6.467  | 7698     | 0.05   | 9880.10         |                |
| 2  | 7.437  | 6533     | 0.05   | 12612.73        | 3.49           |
| 3  | 8.511  | 84363    | 0.58   | 22082.73        | 4.16           |
| 4  | 9.979  | 7103     | 0.05   | 10648.22        | 4.82           |
| 5  | 11.891 | 43453    | 0.30   |                 | 5.07           |
| 6  | 12.344 | 14265565 | 98.37  | 1322.88         | 0.52           |
| 7  | 14.893 | 9442     | 0.07   | 25819.36        | 2.91           |
| 8  | 17.498 | 16548    | 0.11   | 35136.74        | 6.79           |
| 9  | 20.117 | 7544     | 0.05   | 89823.87        | 7.86           |
| 10 | 20.977 | 12222    | 0.08   | 33258.57        | 2.17           |

**Peak Results**

|    | RT     | Area  | % Area | USP Plate Count | USP Resolution |
|----|--------|-------|--------|-----------------|----------------|
| 11 | 21.430 | 9802  | 0.07   | 41853.68        | 0.94           |
| 12 | 22.174 | 24307 | 0.17   | 63089.30        | 1.77           |
| 13 | 23.009 | 7182  | 0.05   | 111995.08       | 2.45           |

www.biopurify.com
